# Supplementary material for: Chia Seed Mucilage Edible Films with Origanum vulgare and Satureja montana Essential Oils: Characterization and Antifungal Properties
Source: MDPI journal article supplement (doi:10.3390/membranes12020213), 2022-02-11
Supplement: s1 [file s1]

# Supplementary Materials: Chia Seed Mucilage Edible Films with *Origanum vulgare* and *Satureja montana* Essential Oils: Characterization and Antifungal Properties

Nuria Muñoz-Tébar <sup>1</sup>, Manuel Carmona <sup>1</sup>, Gonzalo Ortiz de Elguea-Culebras <sup>2</sup>, Ana Molina <sup>1</sup> and María Isabel Berruga <sup>1,\*</sup>

<sup>1</sup> Food Quality Research Group, Institute for Regional Development (IDR), Universidad de Castilla-La Mancha, 02071 Albacete, Spain; nuria.munoz@uclm.es (N.M.-T.); manuel.carmona@uclm.es (M.C.); ana.molina@uclm.es (A.M.)

<sup>2</sup> Centro de Investigación Agroforestal de Albaladejito (IRIAF-JCCM), Carretera Toledo-Cuenca km 174, 16194 Cuenca, Spain; gonzaloo@jccm.es

\* Correspondence: mariaisabel.berruga@uclm.es; Tel.: +34-599200 (ext. 2615)

**Table S1.** Effect of oregano (OEO) or savory (SEO) essential oil in the light transmittance (%) of chia mucilage films (CM).

| Films                      | Wavelength (nm)            |                              |                             |                             |                             |                            |                              |                              |                             |
|----------------------------|----------------------------|------------------------------|-----------------------------|-----------------------------|-----------------------------|----------------------------|------------------------------|------------------------------|-----------------------------|
|                            | 500 <sup>2</sup>           | 550                          | 600                         | 650                         | 700                         | 750                        | 800                          | 850                          | 900                         |
| CM + OEO-0.0% <sup>1</sup> | 21.75 ± 7.41               | 31.98 ± 7.75 <sup>ab</sup>   | 40.19 ± 7.40 <sup>b</sup>   | 45.65 ± 6.06 <sup>b</sup>   | 51.64 ± 6.41 <sup>b</sup>   | 58.12 ± 5.67 <sup>b</sup>  | 62.99 ± 5.09 <sup>b</sup>    | 66.27 ± 4.76 <sup>b</sup>    | 68.65 ± 4.52 <sup>b</sup>   |
| CM + OEO-0.1%              | 12.28 ± 5.20 <sup>A</sup>  | 19.70 ± 5.80 <sup>aA</sup>   | 26.31 ± 5.68 <sup>aA</sup>  | 31.61 ± 5.30 <sup>aA</sup>  | 37.25 ± 4.64 <sup>aA</sup>  | 44.16 ± 3.73 <sup>aA</sup> | 49.48 ± 2.94 <sup>aA</sup>   | 53.47 ± 2.27 <sup>aA</sup>   | 56.51 ± 1.81 <sup>aA</sup>  |
| CM + OEO-1.0%              | 22.04 ± 2.68 <sup>B</sup>  | 32.70 ± 2.65 <sup>abBC</sup> | 40.99 ± 2.67 <sup>bCD</sup> | 47.05 ± 2.66 <sup>bCD</sup> | 52.90 ± 2.89 <sup>bCD</sup> | 60.04 ± 2.36 <sup>bD</sup> | 64.84 ± 2.23 <sup>bD</sup>   | 68.19 ± 2.08 <sup>bD</sup>   | 70.39 ± 1.90 <sup>bC</sup>  |
| CM + OEO-1.5%              | 23.25 ± 3.52 <sup>B</sup>  | 35.78 ± 3.76 <sup>bC</sup>   | 45.54 ± 3.47 <sup>bD</sup>  | 52.58 ± 3.18 <sup>bD</sup>  | 59.39 ± 2.67 <sup>bD</sup>  | 67.60 ± 1.95 <sup>bE</sup> | 73.17 ± 1.39 <sup>cE</sup>   | 76.86 ± 0.95 <sup>cE</sup>   | 79.19 ± 0.83 <sup>cD</sup>  |
| CM + SEO-0.0% <sup>1</sup> | 21.75 ± 7.41               | 31.98 ± 7.75                 | 40.19 ± 7.40                | 45.65 ± 6.06                | 51.64 ± 6.41                | 58.12 ± 5.67               | 62.99 ± 5.09 <sup>b</sup>    | 66.27 ± 4.76 <sup>b</sup>    | 68.65 ± 4.52 <sup>b</sup>   |
| CM + SEO-0.1%              | 21.29 ± 1.99 <sup>B</sup>  | 31.09 ± 1.57 <sup>BC</sup>   | 38.89 ± 1.22 <sup>BCD</sup> | 44.46 ± 0.90 <sup>BC</sup>  | 50.02 ± 0.52 <sup>BC</sup>  | 56.85 ± 0.74 <sup>CD</sup> | 61.84 ± 1.17 <sup>abCD</sup> | 65.40 ± 1.48 <sup>abCD</sup> | 68.02 ± 1.71 <sup>bC</sup>  |
| CM + SEO-1.0%              | 16.29 ± 0.95 <sup>AB</sup> | 26.18 ± 1.25 <sup>AB</sup>   | 34.04 ± 1.39 <sup>ABC</sup> | 39.68 ± 1.34 <sup>BC</sup>  | 45.33 ± 1.29 <sup>B</sup>   | 52.35 ± 1.15 <sup>BC</sup> | 57.44 ± 0.95 <sup>abBC</sup> | 60.98 ± 0.75 <sup>abBC</sup> | 63.51 ± 0.63 <sup>abB</sup> |
| CM + SEO-1.5%              | 15.81 ± 1.38 <sup>AB</sup> | 25.13 ± 1.49 <sup>AB</sup>   | 32.40 ± 1.20 <sup>AB</sup>  | 37.75 ± 0.97 <sup>AB</sup>  | 43.07 ± 0.87 <sup>AB</sup>  | 49.55 ± 0.80 <sup>AB</sup> | 54.31 ± 1.29 <sup>aAB</sup>  | 57.65 ± 1.72 <sup>aAB</sup>  | 59.93 ± 2.04 <sup>aAB</sup> |

<sup>1</sup> Values obtained in a previous work (Muñoz-Tebar et al. [12])<sup>2</sup> Not significant differences from 200 to 450 nm.<sup>a-c</sup> Different superscripts between row means significant differences ( $p < 0.05$ ) due to EOs concentration.<sup>A-B</sup> Different superscripts between columns means significant differences ( $p < 0.05$ ) due to the essential oils used in the film formulation.Data without any superscripts means that there were no significant differences ( $p > 0.05$ ) either by EOs concentration effect (indicated with lower case letters) or by the EOs used in the formulation (indicated with capital letters).
